# Supplementary material
Source: PubMed Central journal article supplement (PMC3838741)

# **$\beta$ -Catenin Serves as a Clutch between Low and High Intercellular E-Cadherin Bond Strengths**

Saumendra Bajpai,<sup>†‡Δ</sup> Yunfeng Feng,<sup>‡§Δ</sup> Denis Wirtz,<sup>†‡\*</sup> and Gregory D. Longmore<sup>‡§\*</sup>

<sup>†</sup>Department of Chemical and Biomolecular Engineering and <sup>‡</sup>Johns Hopkins Physical Sciences - Oncology Center, The Johns Hopkins University, Baltimore, Maryland; and <sup>§</sup>Departments of Medicine and Cell Biology and Physiology and BRIGHT Institute, Washington University School of Medicine, St. Louis, Missouri

## **Captions of supplemental figures**

### **Supplemental 1. Frequency of Ecad/Ecad binding determined by calcium-depletion as control.**

1 mM EGTA was used a chelating agent, to deplete  $\text{Ca}^{+2}$  from culture-media. EGTA was directly added to the cell-culture dish after changing to serum-free media and incubated for 30 min, before recording bond-rupture events. All retractions were measured at 10  $\mu\text{m}/\text{sec}$ . Up to 5 independent experiments were conducted and  $n \sim 140$  bond rupture events were recorded.

### **Supplemental 2. Occurrence of bond-ruptures of various strengths.**

(A) Distribution of mean cell-cell bond strengths for cells expressing wt  $\beta$ -catenin,  $\beta$ -catenin knocked-down, and cells expressing a fusion protein. (B) Distribution of mean cell-cell bond strengths for cells expressing mut  $\beta$ -catenin and cells expressing the fusion protein. (C and D) Distributions of mean cell-cell bond strengths for short contact time (1 ms) and long contact time (300 ms) between cells expression wt  $\beta$ -catenin or with wt  $\beta$ -catenin knocked down.

### **Supplemental 3: Construction of HCT116 derived cell populations**

(A) Expression of E-cadherin- $\alpha$ -catenin fusion protein. HCT- $\mu$  or wt/- were transduced with lentivirus that contains E-cadherin- $\alpha$ -catenin fusion expression cassette, cells were selected by puromycin. (B) Depletion of  $\beta$ -catenin in HCT wt/- that expressed E-cadherin- $\alpha$ -catenin fusion protein. Cells were transduced sequentially with the lentiviruses with different drug selection marker as indicated, cells were selected with puromycin and blasticidine. (C) Depletion of GSK3 $\beta$  in HCT116 derived cells. HCT wt/- and  $\mu$  cells were transduced with lentiviruses that carried GSK3 $\beta$  shRNA expression cassette as indicated, selected with puromycin. (D) Depletion of  $\alpha$ -catenin in HCT wt/- and  $\mu$  that expressed E-cadherin- $\alpha$ -catenin fusion protein. Cells were transduced sequentially with the lentiviruses with different drug selection marker as indicated, cells were selected with puromycin and blasticidine. Western-blot were performed using antibodies, as indicated.

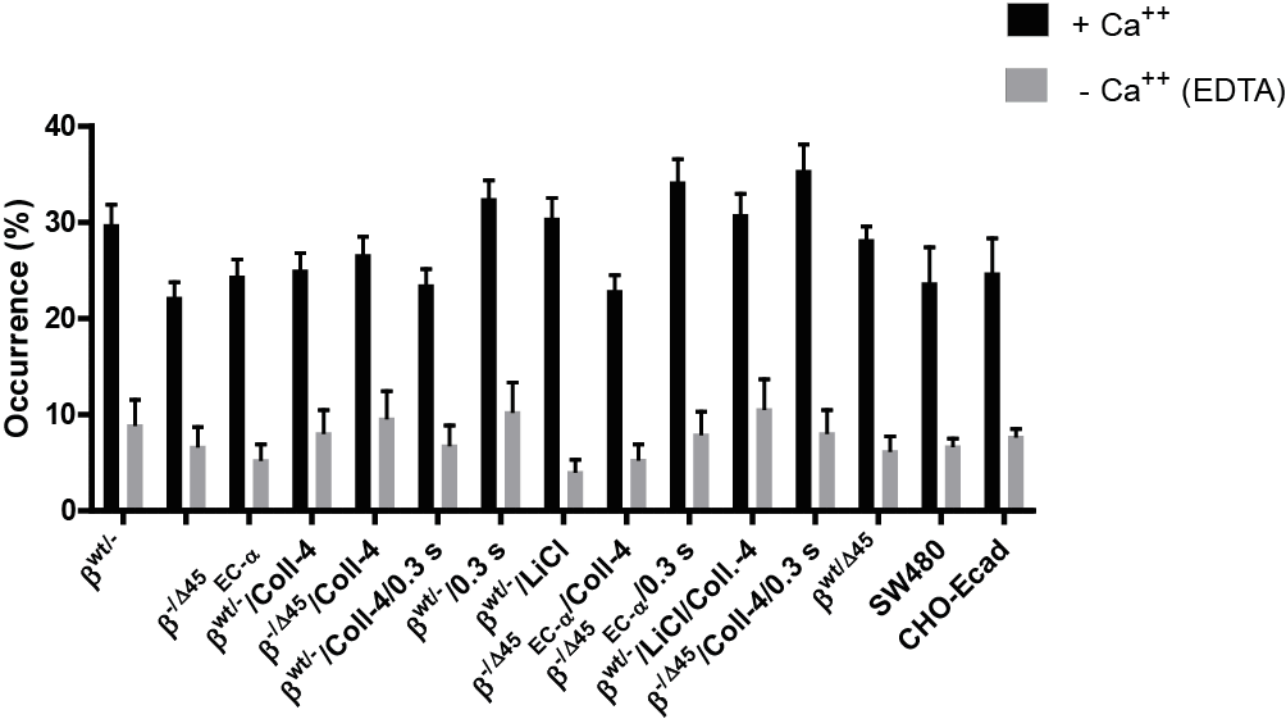

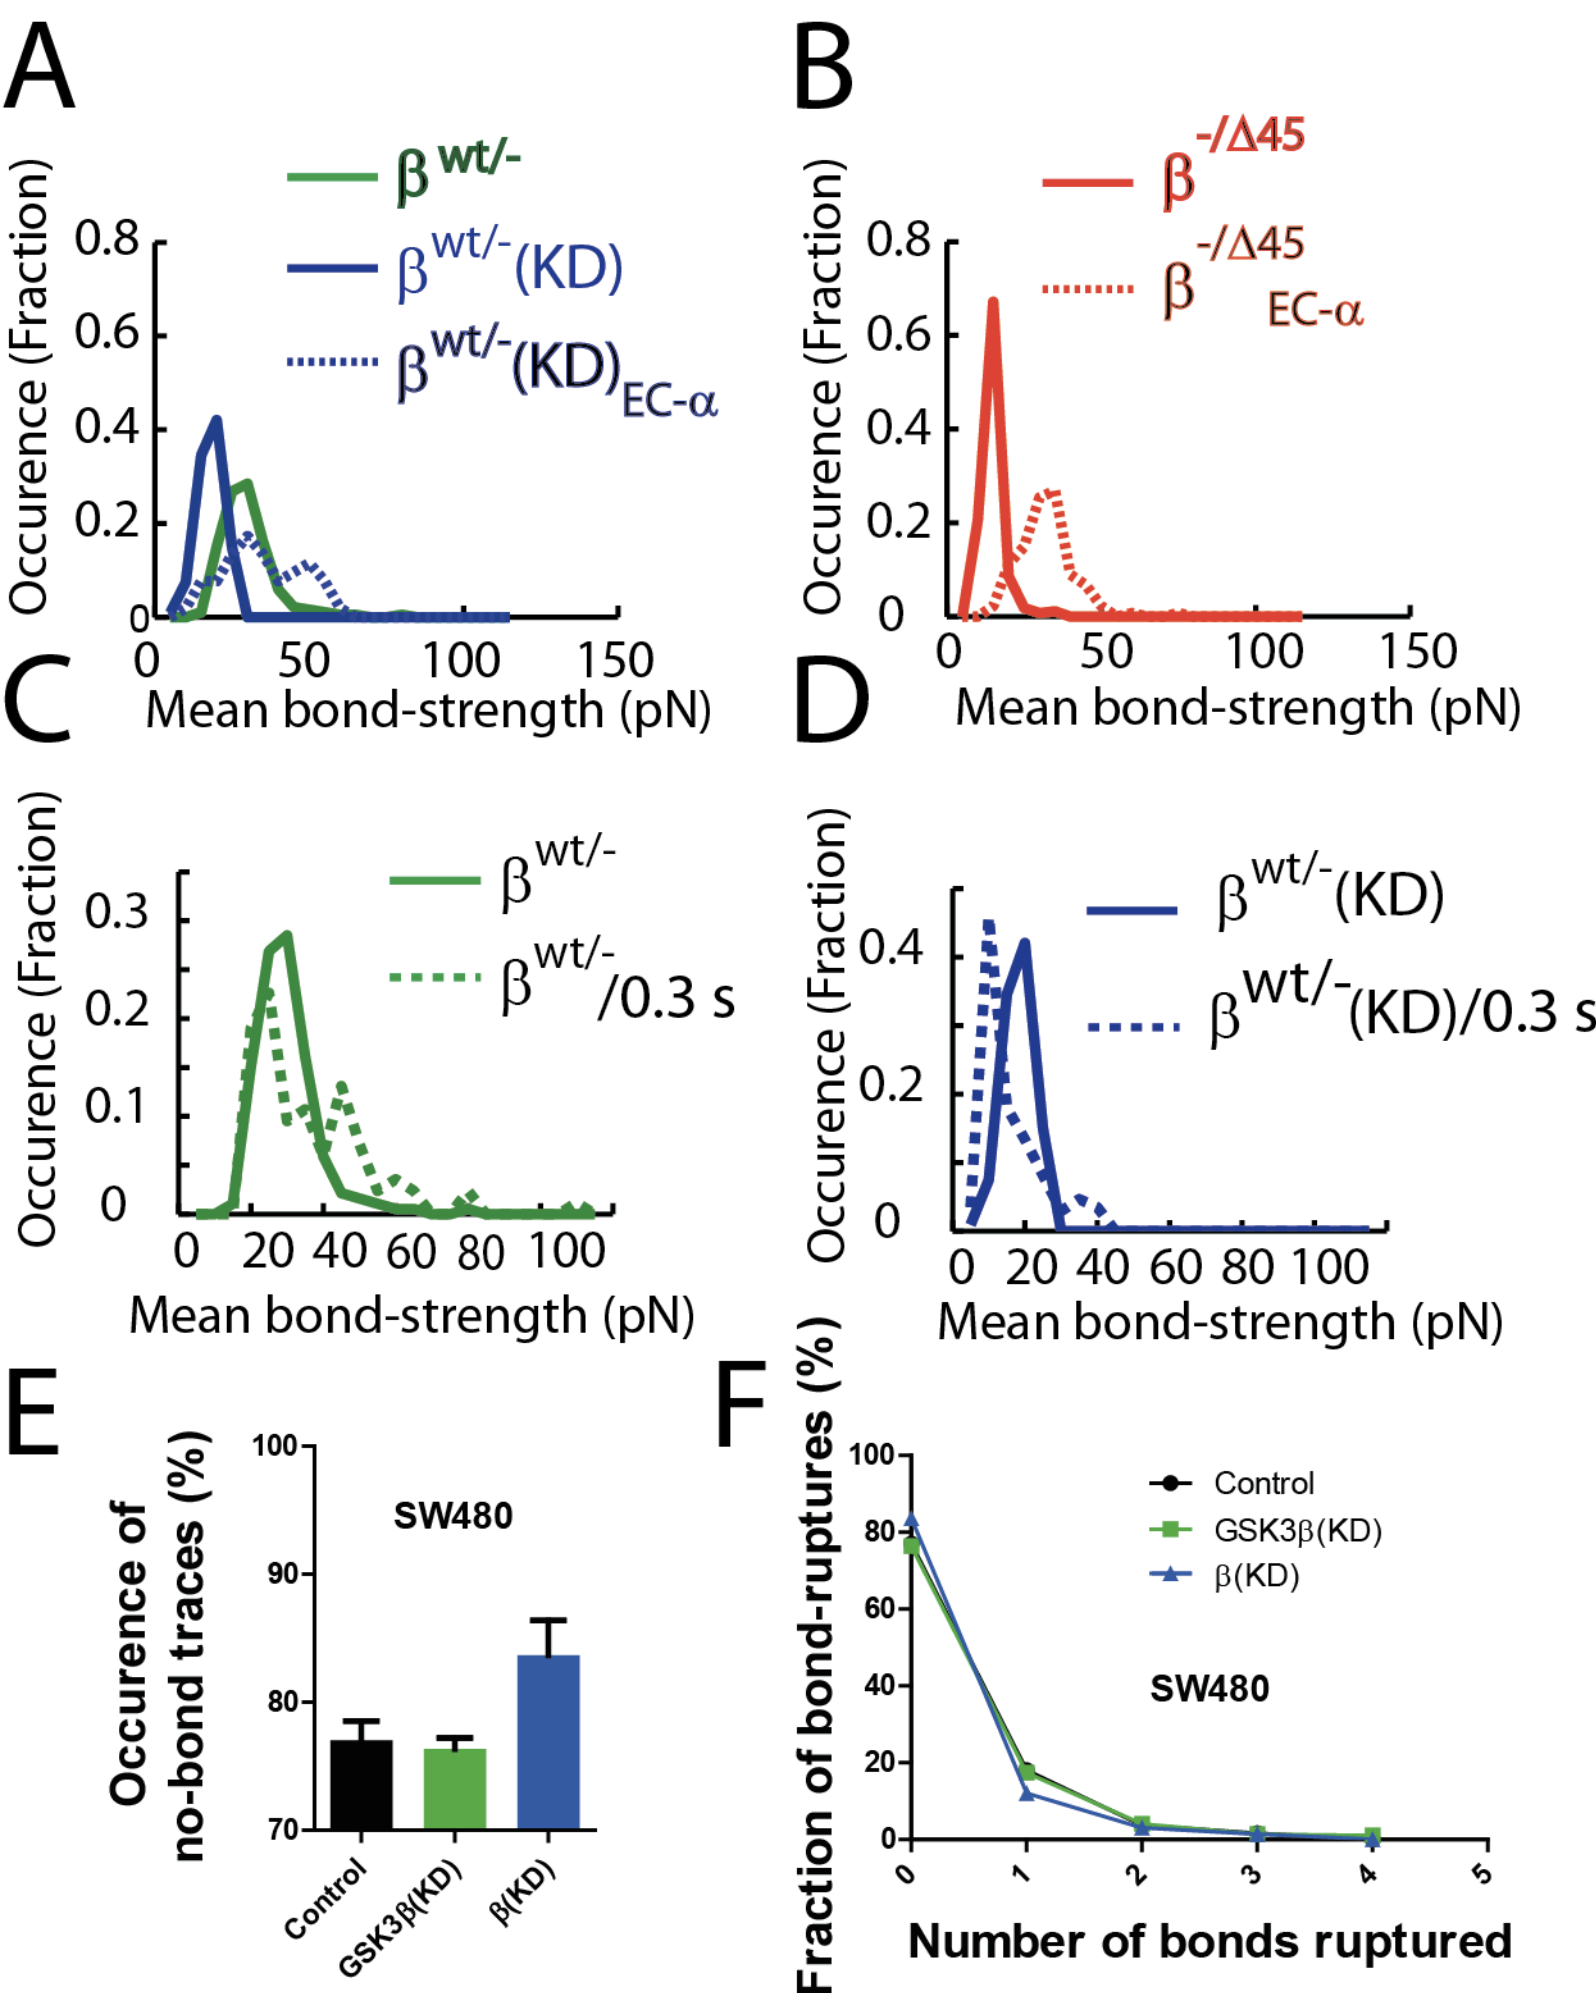

**A**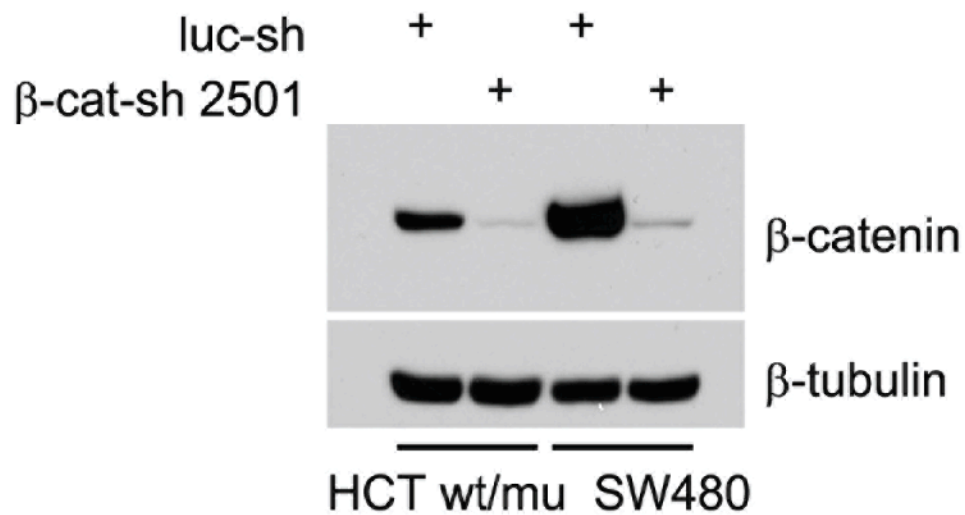**B**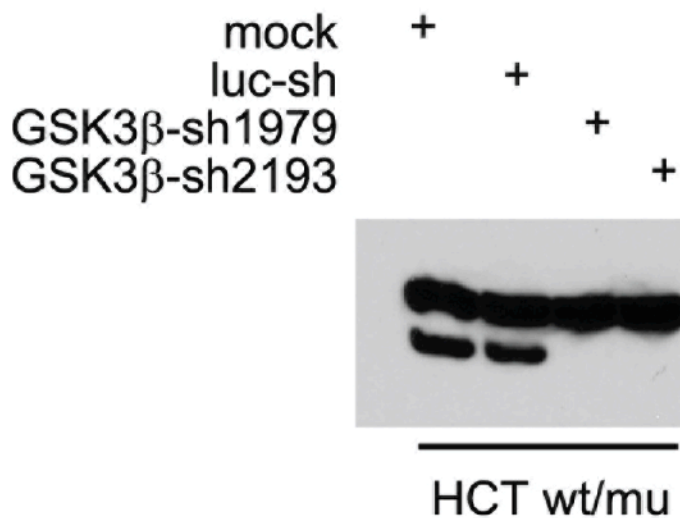

Supplement: mmc1.pdf [file mmc1.pdf]
